# Supplementary material for: Calibrating Observational Health Record Data Against a Randomized Trial
Source: PubMed Central journal article supplement — JAMA Netw Open. 2024 Sep 30;7(9):e2436535. doi: 10.1001/jamanetworkopen.2024.36535 (PMC11443351; doi:10.1001/jamanetworkopen.2024.36535), 2024-09-30
Supplement: jamanetwopen-e2436535-s003.pdf [file jamanetwopen-e2436535-s003.pdf]

## Data Sharing Statement

Merola. Calibrating Observational Health Record Data Against a Randomized Trial. *JAMA Netw Open*. Published September 30, 2024. doi:10.1001/jamanetworkopen.2024.36535

### Data

**Data available:** No
